# Supplementary material for: The MOWER (middle of the week everyone gets a re-chart) pilot study: reducing in-hospital charting error with a multi-intervention
Source: Springer Nature journal article supplement (doi:10.1186/s12913-019-4230-y), 2019-06-20
Supplement: MOESM1 [file 16838560]

Every Chart Numbered

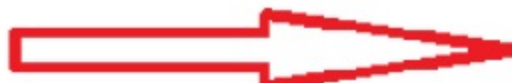

Medication chart number **I** of **II**

Print \_\_\_\_\_ Date \_\_\_\_\_

First prescriber to print patient name and check label correct: **J Bloggs** ←

Weight (kg): \_\_\_\_\_ Height (cm): \_\_\_\_\_

### Regular medicines

Year 20 15 Date and month →

PRESCRIBER MUST ENTER administration times →

|                      |                               |                               |      |
|----------------------|-------------------------------|-------------------------------|------|
| Date                 | Medicine (print generic name) | Tick if slow release          |      |
| 8/09                 | ceftriaxone                   |                               | 1200 |
| Route                | Dose                          | Frequency and NOW enter times |      |
| IV                   | 1g                            | daily                         |      |
| Indication           | Pharmacy                      |                               |      |
| UTI                  |                               |                               |      |
| Prescriber signature | Print your name               | Contact                       |      |
| J Bloggs             | J Bloggs                      |                               |      |

Continue on discharge? Yes/No  
Dispense? Yes/No  
Duration: \_\_\_\_\_ days Qty \_\_\_\_\_

Date: \_\_\_\_\_

Patient surname handwritten below patient label

Indication essential for antibiotics, anticoagulants and steroids

|                      |                               |                               |  |
|----------------------|-------------------------------|-------------------------------|--|
| Date                 | Medicine (print generic name) | Tick if slow release          |  |
| 8/09                 | ceftriaxone                   |                               |  |
| Route                | Dose                          | Frequency and NOW enter times |  |
| IV                   | 1g                            | daily                         |  |
| Indication           | Pharmacy                      |                               |  |
| UTI                  |                               |                               |  |
| Prescriber signature | Print your name               | Contact                       |  |
| J Bloggs             | J Bloggs                      |                               |  |

Continue on discharge? Yes/No  
Dispense? Yes/No  
Duration: \_\_\_\_\_ days Qty \_\_\_\_\_

Date: \_\_\_\_\_

Generic drug name

Every order signed and dated

Prescriber's printed surname only necessary once on page viewed

|                      |                               |                  |                     |
|----------------------|-------------------------------|------------------|---------------------|
| Date                 | Medicine (print generic name) | Date             |                     |
| 8/09                 | metoclopramide                |                  |                     |
| Route                | Dose                          | Hourly frequency | Max PRN dose/24 hrs |
| O/SC                 | 10mg                          | q6hr             | 40mg                |
| Indication           | Pharmacy                      | Dose             |                     |
| nausea               |                               | Route            |                     |
| Prescriber signature | Print your name               | Contact          | Sign                |
| J Bloggs             | Dr J Bloggs                   | 101              |                     |

Continue on discharge? Yes/No  
Dispense? Yes/No  
Duration: \_\_\_\_\_ days Qty \_\_\_\_\_

Every PRN order needs a 'Max' dose and an indication
